# Supplementary material for: Sustainable deep eutectic solvent-engineered clove-derived carbon dots as a single sensing platform for the detection of multiple antioxidants
Source: Royal Society of Chemistry journal article supplement (doi:10.1039/d6ra02145j), 2026-05-11
Supplement: d6ra02145j1.pdf [file d6ra02145j1.pdf]

## Supporting Information

### **Sustainable Deep Eutectic Solvent-Engineered Clove-Derived Carbon Dots as a Single Sensing Platform for the Detection of Multiple Antioxidants**

Mandeep Kaur<sup>‡</sup>, Mallika Phull<sup>‡</sup>, Urvashi Singh, Diksha Bhatia, Banibrata Maity\*

Department of Chemistry and Biochemistry, Thapar Institute of Engineering and Technology,  
Patiala, 147004, India

\*Corresponding Author:

Dr. Banibrata Maity

E-mail: Banibrata.maity@thapar.edu

**Figure S1**

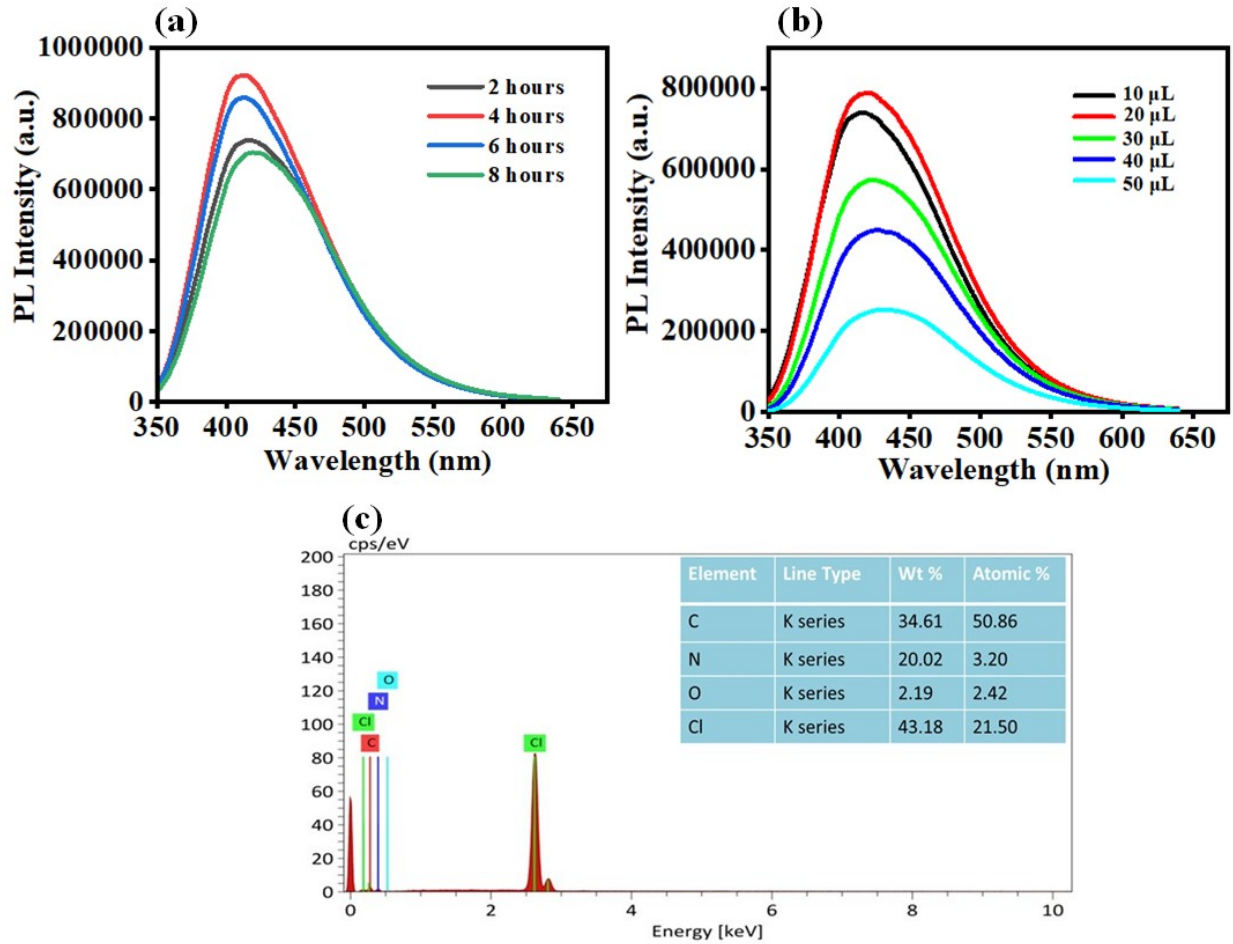

**Figure S1.** (a) Optimization of CDs concentration, (b) Reaction time-dependent optimization of CDs synthesis, (c) EDS spectrum of the as-prepared CDs.

**Figure S2**

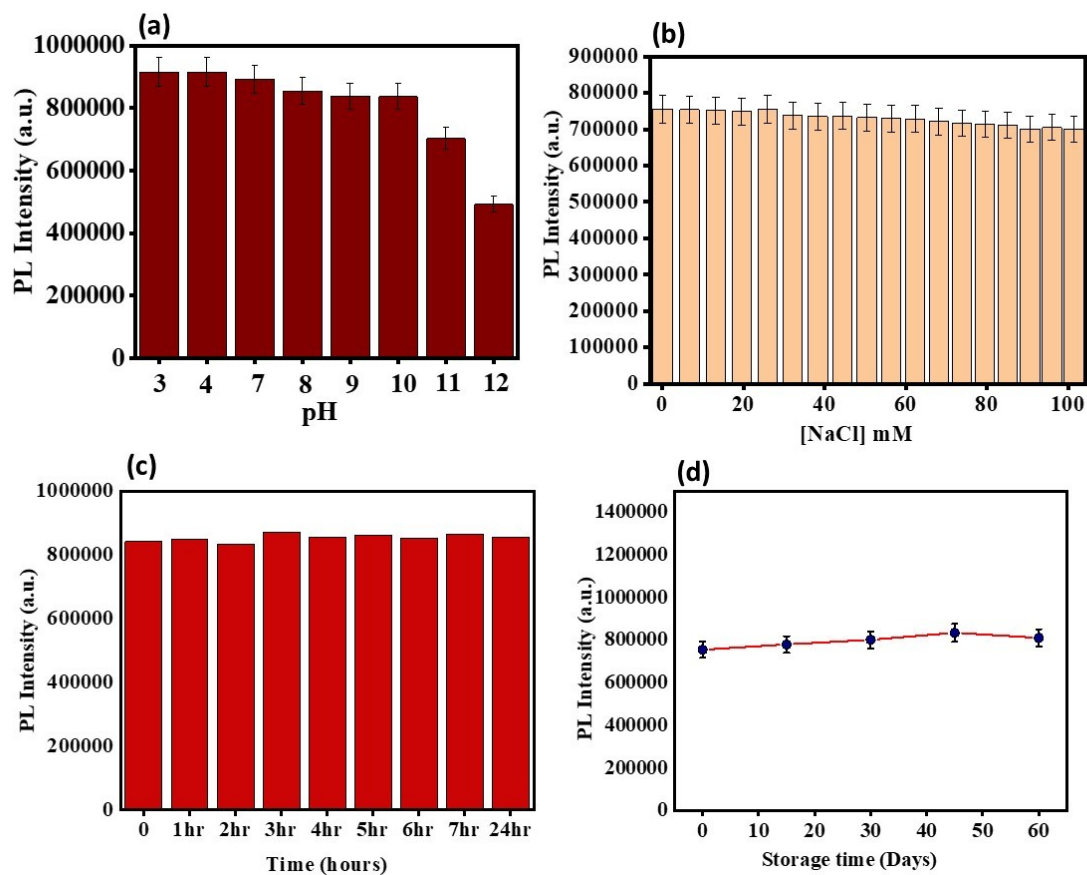

**Fig S2.** (a) Effect of pH (b) Effect of ionic strength (c) Photo irradiation studies (d) Storage studies on prepared CDs.

**Figure S3**

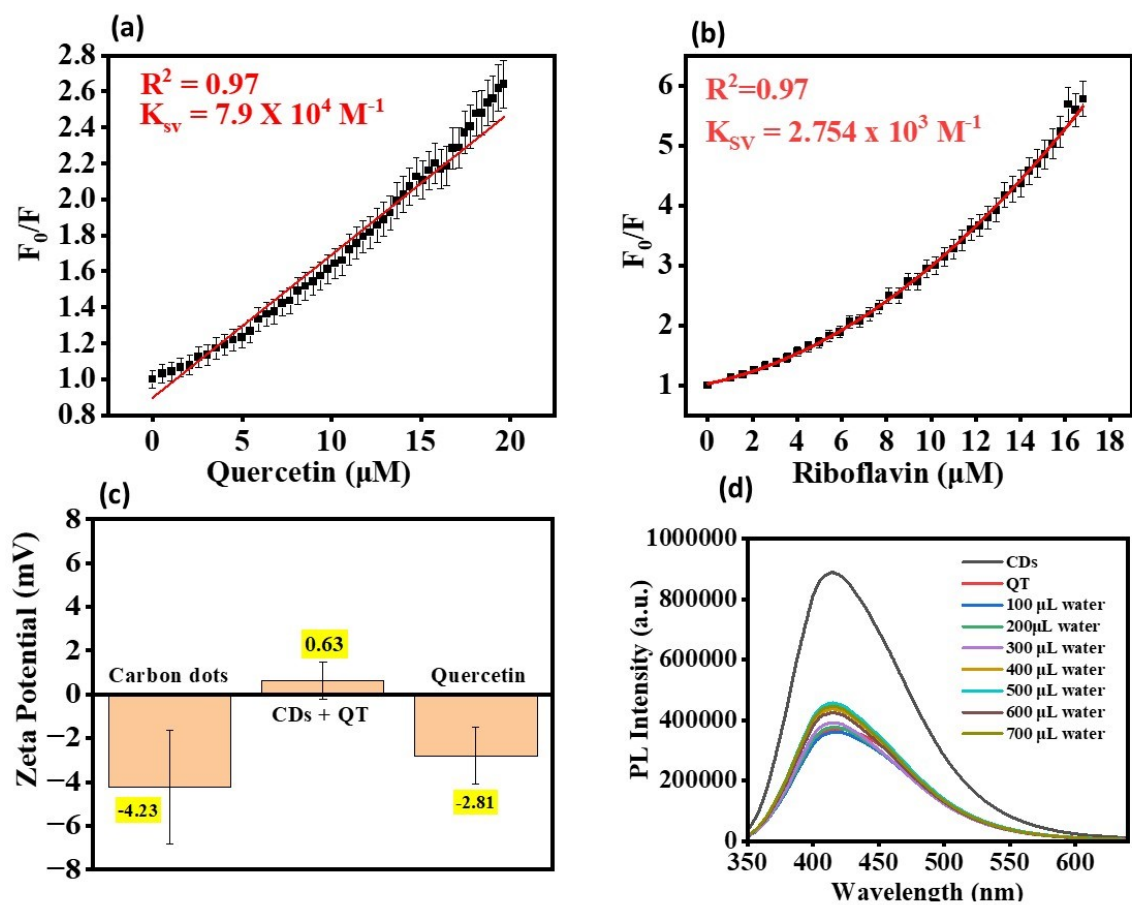

**Fig S3.** Stern-Volmer plot between  $F_0/F$  and different concentration of (a) QT, (b)RF, (c) Zeta Potential of CDs, QT and CDs+QT and (d) Effect of dilution on QT.

**Figure S4**

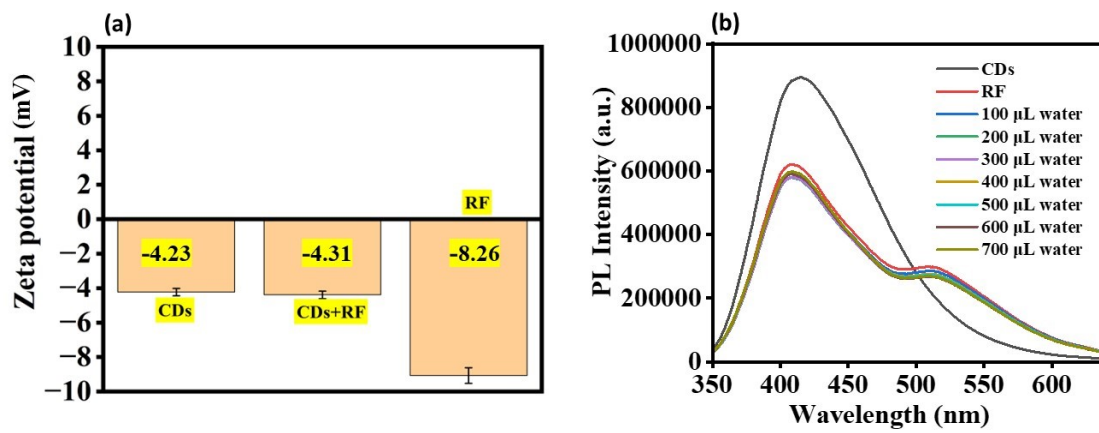

**Fig S4.** (a) Zeta Potential of CDs, RF and CDs+RF and (b) Effect of dilution on RF.

**Figure S5**

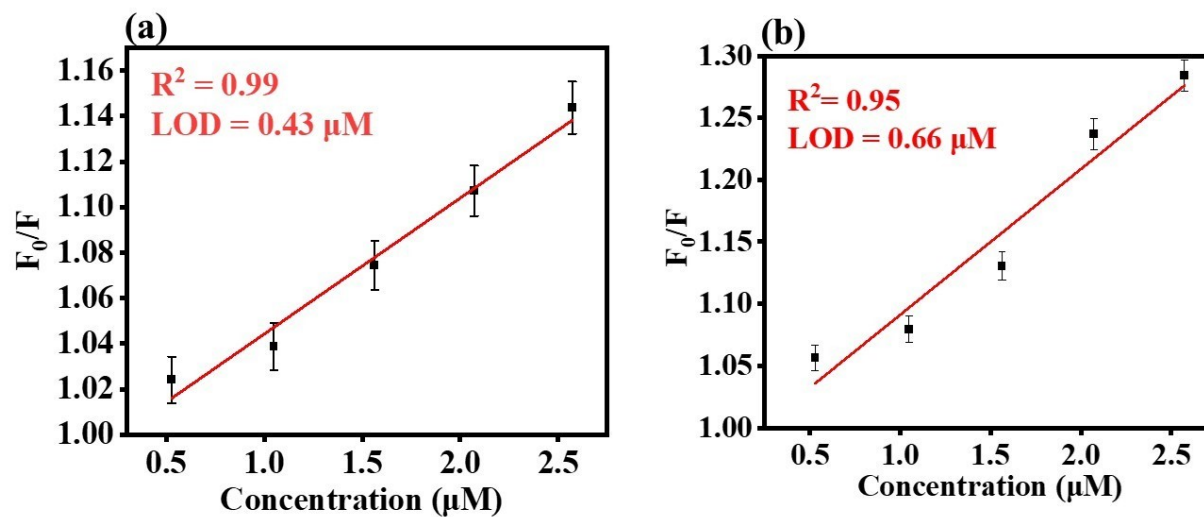

**Figure S5.** (a) Linear relationship of  $F_0/F$  of carbon dots with different concentration QT in real sample of apple juice. (b) Linear correlation of  $F_0/F$  with different concentration of RF in real sample of vitamin B<sub>2</sub> Tablet.

**Table S1****(a)**

| Sample   | $\Phi_f(\%)$ | $\tau m$ (ns) | $\chi^2$ |
|----------|--------------|---------------|----------|
| CDs      | 22.5         | 2.93          | 1.11     |
| CDs + QT | 3.2          | 2.85          | 1.12     |
| CDs + RF | 5.6          | 2.10          | 1.06     |

**(b)**

| Sample   | $R_0$<br>(nm) | $k_{ET}(ns^{-1})$ | $k_r(ns^{-1})$ | $k_{nr}(ns^{-1})$ | E(%) | r(nm) |
|----------|---------------|-------------------|----------------|-------------------|------|-------|
| CDs + RF | 3.51          | 0.13              | 0.0267         | 0.449             | 21.4 | 4.36  |

**Table S1.** (a) photophysical parameters of CDs in presence of analytes (b) FRET parameters of CDs in presence of RF.

**Table S2**

| Conc added ( $\mu\text{M}$ ) | Conc found ( $\mu\text{M}$ ) | Recovery (%) | Relative standard deviation (RSD) |
|------------------------------|------------------------------|--------------|-----------------------------------|
| 0.5 $\mu\text{M}$            | 0.49 $\mu\text{M}$           | 98 %         | 1.4 %                             |
| 1.04 $\mu\text{M}$           | 1.03 $\mu\text{M}$           | 99 %         | 0.6 %                             |
| 2.57 $\mu\text{M}$           | 2.31 $\mu\text{M}$           | 89.8 %       | 7.5 %                             |

**Table S2.** Real estimation of QT in apple juice.

**Table S3**

| Conc added          | Conc found         | Recovery % | Relative standard deviation (RSD) |
|---------------------|--------------------|------------|-----------------------------------|
| 0.528 $\mu\text{M}$ | 0.57 $\mu\text{M}$ | 109.6 %    | 5.4 %                             |
| 1.049 $\mu\text{M}$ | 1.08 $\mu\text{M}$ | 103.8 %    | 2.0 %                             |
| 1.563 $\mu\text{M}$ | 1.60 $\mu\text{M}$ | 106.6 %    | 1.6 %                             |
| 2.07 $\mu\text{M}$  | 2.30 $\mu\text{M}$ | 111.1 %    | 7.4 %                             |
| 2.572 $\mu\text{M}$ | 2.7 $\mu\text{M}$  | 108 %      | 3.4 %                             |

**Table S3.** Real estimation of RF in vitamin B<sub>2</sub> tablets.
